# Supplementary material for: HPV Population Profiling in Healthy Men by Next-Generation Deep Sequencing Coupled with HPV-QUEST
Source: PubMed Central journal article supplement (PMC4776183; doi:10.3390/v8020028), 2016-01-25
Supplement: viruses-08-00028-s001.pdf [file viruses-08-00028-s001.pdf]

# Supplementary Materials: HPV Population Profiling in Healthy Men by Next Generation Deep Sequencing Coupled with HPV-QUEST

Li Yin, Jin Yao, Kaifen Chang, Brent P. Gardner, Fahong Yu, Anna R. Giuliano and Maureen M. Goodenow

Table S1. Demographic and sequence profiles of samples.

| Sample ID | HPV Genotype(s) Identified by Deep Sequencing Number [genotype] | Sex Partners # (number) | Age (year) | Country of Origin | Sequence Number |                          |                     |
|-----------|-----------------------------------------------------------------|-------------------------|------------|-------------------|-----------------|--------------------------|---------------------|
|           |                                                                 |                         |            |                   | Raw Reads ‡     | Mapped Quality Sequences |                     |
|           |                                                                 |                         |            |                   |                 | Individual Sequences     | Consensus Sequences |
| S1        | 1 [6b]                                                          | 0                       | 19         | US                | 1806            | 1550                     | 8                   |
| S2        | 1 [6b]                                                          | 1                       | 22         | US                | 685             | 633                      | 2                   |
| S3        | 1 [16]                                                          | N/A ¶                   | 19         | US                | 1468            | 1362                     | 6                   |
| S4        | 1 [16]                                                          | 0                       | 20         | US                | 2061            | 1891                     | 7                   |
| S5        | 1 [16]                                                          | 3                       | 20         | US                | 145             | 121                      | 1                   |
| S6        | 1 [83]                                                          | 3                       | 27         | US                | 1656            | 1519                     | 2                   |
| S7        | 3 [6b/83/87]                                                    | 1                       | 23         | US                | 1344            | 1015                     | 1/1/1               |
| S8        | 3 [16/18/6b]                                                    | 1                       | 20         | US                | 828             | 701                      | 1/2/1               |
| S9        | 3 [16/52/59]                                                    | 3                       | 19         | US                | 1686            | 1534                     | 1/1/6               |
| S10       | 2 [70/73]                                                       | 3                       | 21         | US                | 2128            | 1866                     | 1/5                 |
| S11       | 3 [73/cand85/6b]                                                | 0                       | 19         | US                | 1899            | 1698                     | 1/1/2               |
| S12       | 4 [16/35/66/6b]                                                 | 0                       | 32         | US                | 1808            | 1660                     | 1/1/1/1             |
| S13       | 5 [70/73/cand85/32/JEB2]                                        | 0                       | 52         | US                | 456             | 409                      | 1/1/1/1/3           |
| S14       | 5 [16/31/56/66/62]                                              | 0                       | 31         | US                | 991             | 941                      | 2/1/1/1/1           |
| S15 (T0)  | 2 [16/51]                                                       | 1                       | 22         | US                | 50,061          | 49,060                   | 1/1                 |
| S15 (T1)  | 2 [16/81]                                                       | 2                       | 22         |                   | 16,393          | 15,702                   | 1/1                 |
| S15 (T2)  | 2 [16/83]                                                       | 1                       | 23         |                   | 18,808          | 18,161                   | 1/1                 |
| S16 (T0)  | 2 [16/11]                                                       | 0                       | 36         | Mexico            | 13,183          | 12,584                   | 1/1                 |
| S16 (T1)  | 1 [16]                                                          | 0                       | 37         |                   | 27,376          | 26,988                   | 1                   |
| S16 (T2)  | 1 [16]                                                          | 0                       | 38         |                   | 31,440          | 31,236                   | 1                   |
| S17       | 1 [16]                                                          | 0                       | 41         | Mexico            | 36,771          | 36,038                   | 1                   |
| S18       | 2 [81/cand89]                                                   | 1                       | 43         | Brazil            | 43,698          | 43,599                   | 3/1                 |
| C-4 II    | 1                                                               | -                       | -          | -                 | 16,586          | 16,444                   | 1                   |
| CaSki     | 1                                                               | -                       | -          | -                 | 22,924          | 22,763                   | 1                   |
| HPV16 *   | 1                                                               | -                       | -          | -                 | 26,193          | 25,928                   | 1                   |

\*: a molecular clone; #: number of sex partner(s) within 6 weeks prior to sampling; ¶: information unavailable; ‡: >50% of base calls within each read with Phred quality score  $\geq 40$ .

**Table S2.** HPV genotyping using HPV-QUEST vs. PaVE PV Specific Blastn.

| Sample ID | HPV-QUEST      |          |       |         |                | PaVE PV Specific Blastn |          |       |         |                |
|-----------|----------------|----------|-------|---------|----------------|-------------------------|----------|-------|---------|----------------|
|           | Type (Variant) | GI       | Score | E Value | Local Identity | Type (Variant)          | GI       | Score | E Value | Local Identity |
| S1        | 6b (1)         | 60955    | 180   | 4E-47   | 91/91          | 6b (1)                  | 60955    | 180   | 7E-47   | 91/91          |
|           | 6b (2)         | 60955    | 170   | 4E-44   | 89/90          | 6b (2)                  | 60955    | 170   | 6E-44   | 89/90          |
|           | 6b (3)         | 60955    | 162   | 9E-42   | 88/90          | 6b (3)                  | 60955    | 163   | 2E-41   | 88/90          |
|           | 6b (4)         | 60955    | 170   | 4E-44   | 89/90          | 6b (4)                  | 60955    | 170   | 6E-44   | 89/90          |
|           | 6b (5)         | 60955    | 162   | 9E-42   | 88/90          | 6b (5)                  | 60955    | 163   | 2E-41   | 88/90          |
|           | 6b (6)         | 60955    | 162   | 9E-42   | 88/90          | 6b (6)                  | 60955    | 163   | 2E-41   | 88/90          |
|           | 6b (7)         | 60955    | 168   | 1E-43   | 88/89          | 6b (7)                  | 60955    | 168   | 2E-43   | 88/89          |
|           | 6b (8)         | 60955    | 166   | 6E-43   | 87/88          | 6b (8)                  | 60955    | 167   | 1E-42   | 87/88          |
| S2        | 6b (1)         | 60955    | 180   | 4E-47   | 91/91          | 6b (1)                  | 60955    | 180   | 7E-47   | 91/91          |
|           | 6b (2)         | 60955    | 162   | 9E-42   | 88/90          | 6b (2)                  | 60955    | 163   | 2E-41   | 89/90          |
| S3        | 16 (1)         | 333031   | 186   | 7E-49   | 94/94          | 16 (1)                  | 333031   | 186   | 1E-48   | 94/94          |
|           | 16 (2)         | 333031   | 168   | 2E-43   | 91/93          | 16 (2)                  | 333031   | 168   | 3E-43   | 91/93          |
|           | 16 (3)         | 333031   | 168   | 2E-43   | 91/93          | 16 (3)                  | 333031   | 168   | 3E-43   | 91/93          |
|           | 16 (4)         | 333031   | 168   | 2E-43   | 91/93          | 16 (4)                  | 333031   | 168   | 3E-43   | 91/93          |
|           | 16 (5)         | 333031   | 168   | 2E-43   | 91/93          | 16 (5)                  | 333031   | 168   | 3E-43   | 91/93          |
|           | 16 (6)         | 333031   | 168   | 2E-43   | 91/93          | 16 (6)                  | 333031   | 168   | 3E-43   | 91/93          |
| S4        | 16 (1)         | 333031   | 186   | 7E-49   | 94/94          | 16 (1)                  | 333031   | 186   | 1E-48   | 94/94          |
|           | 16 (2)         | 333031   | 168   | 2E-43   | 91/93          | 16 (2)                  | 333031   | 168   | 3E-43   | 91/93          |
|           | 16 (3)         | 333031   | 160   | 4E-41   | 90/93          | 16 (3)                  | 333031   | 161   | 6E-41   | 90/93          |
|           | 16 (4)         | 333031   | 176   | 6E-46   | 92/93          | 16 (4)                  | 333031   | 176   | 1E-45   | 92/93          |
|           | 16 (5)         | 333031   | 170   | 4E-44   | 92/94          | 16 (5)                  | 333031   | 170   | 7E-44   | 92/94          |
|           | 16 (6)         | 333031   | 168   | 2E-43   | 91/93          | 16 (6)                  | 333031   | 163   | 2E-41   | 91/93          |
|           | 16 (7)         | 333031   | 168   | 2E-43   | 91/93          | 16 (7)                  | 333031   | 168   | 3E-43   | 91/93          |
| S5        | 16             | 333031   | 186   | 7E-49   | 94/94          | 16                      | 333031   | 186   | 1E-48   | 94/94          |
| S6        | 83 (1)         | 5059324  | 172   | 1E-44   | 87/87          | 83 (1)                  | 5059324  | 172   | 2E-44   | 87/87          |
|           | 83 (2)         | 5059324  | 160   | 4E-41   | 84/85          | 83 (2)                  | 5059324  | 161   | 6E-41   | 84/85          |
| S7        | 6b             | 60955    | 178   | 2E-46   | 90/90          | 6b                      | 60955    | 178   | 3E-46   | 90/90          |
|           | 83             | 5059324  | 172   | 1E-44   | 87/87          | 83                      | 5059324  | 172   | 2E-44   | 87/87          |
|           | 87             | 14475578 | 172   | 9E-45   | 87/87          | 87                      | 14475578 | 172   | 2E-44   | 87/87          |
| S8        | 16             | 333031   | 176   | 6E-46   | 92/93          | 16                      | 333031   | 176   | 1E-45   | 92/93          |
|           | 18 (1)         | 60975    | 186   | 7E-49   | 94/94          | 18 (1)                  | 60975    | 192   | 2E-50   | 97/97          |
|           | 18 (2)         | 60975    | 174   | 3E-45   | 91/92          | 18 (2)                  | 60975    | 178   | 3E-46   | 93/94          |
|           | 6b             | 60955    | 239   | 9E-65   | 130/133        | 6b                      | 60955    | 240   | 1E-64   | 130/133        |
| S9        | 16             | 333031   | 186   | 7E-49   | 94/94          | 16                      | 333031   | 186   | 1E-48   | 94/94          |
|           | 52             | 397038   | 180   | 4E-47   | 91/91          | 52                      | 397038   | 180   | 7E-47   | 91/91          |
|           | 59 (1)         | 557236   | 192   | 1E-50   | 97/97          | 59 (1)                  | 557236   | 192   | 2E-50   | 97/97          |
|           | 59 (2)         | 557236   | 174   | 3E-45   | 94/96          | 59 (2)                  | 557236   | 174   | 4E-45   | 94/96          |
|           | 59 (3)         | 557236   | 166   | 6E-43   | 93/96          | 59 (3)                  | 557236   | 167   | 1E-42   | 93/96          |
|           | 59 (4)         | 557236   | 174   | 3E-45   | 91/92          | 59 (4)                  | 557236   | 174   | 4E-45   | 91/92          |
|           | 59 (5)         | 557236   | 174   | 3E-45   | 94/96          | 59 (5)                  | 557236   | 174   | 4E-45   | 94/96          |
| 59 (6)    | 557236         | 174      | 3E-45 | 94/96   | 59 (6)         | 557236                  | 174      | 4E-45 | 94/96   |                |
| S10       | 70             | 1173493  | 188   | 2E-49   | 98/99          | 70                      | 1173493  | 188   | 3E-49   | 98/99          |
|           | 73 (1)         | 1491692  | 190   | 5E-50   | 99/100         | 73 (1)                  | 1491692  | 190   | 8E-50   | 99/100         |
|           | 73 (2)         | 1491692  | 166   | 7E-43   | 93/96          | 73 (2)                  | 1491692  | 167   | 1E-42   | 93/96          |
|           | 73 (3)         | 1491692  | 166   | 7E-43   | 93/96          | 73 (3)                  | 1491692  | 167   | 1E-42   | 93/96          |
|           | 73 (4)         | 1491692  | 166   | 7E-43   | 96/100         | 73 (4)                  | 1491692  | 167   | 1E-42   | 96/100         |
|           | 73 (5)         | 1491692  | 166   | 7E-43   | 96/100         | 73 (5)                  | 1491692  | 167   | 1E-42   | 96/100         |
| S11       | 73             | 1491692  | 156   | 5E-40   | 85/87          | 73                      | 1491692  | 157   | 9E-40   | 85/87          |
|           | Cand85         | 4574720  | 174   | 3E-45   | 94/96          | Cand85                  | 4574720  | 174   | 4E-45   | 94/96          |
|           | 6b (1)         | 60955    | 180   | 4E-47   | 91/91          | 6b (1)                  | 60955    | 180   | 7E-47   | 91/91          |
|           | 6b (2)         | 60955    | 152   | 9E-39   | 86/89          | 6b (2)                  | 60955    | 157   | 9E-40   | 85/87          |
| S12       | 16             | 333031   | 186   | 7E-49   | 94/94          | 16                      | 333031   | 186   | 1E-48   | 94/94          |
|           | 35h            | 396997   | 178   | 2E-46   | 93/94          | 35h                     | 396997   | 178   | 3E-46   | 93/94          |
|           | 66             | 1020290  | 180   | 4E-47   | 91/91          | 66                      | 1020290  | 180   | 7E-47   | 91/91          |
|           | 6b             | 60955    | 178   | 2E-46   | 90/90          | 6b                      | 60955    | 178   | 3E-46   | 90/90          |

Table S2. Cont.

| Sample ID  | HPV-QUEST      |          |       |         |                | PaVE PV Specific Blastn |          |       |         |                |
|------------|----------------|----------|-------|---------|----------------|-------------------------|----------|-------|---------|----------------|
|            | Type (Variant) | GI       | Score | E Value | Local Identity | Type (Variant)          | GI       | Score | E Value | Local Identity |
| S13        | 70             | 1173493  | 184   | 3E-48   | 96/97          | 70                      | 1173493  | 184   | 5E-48   | 96/97          |
|            | 73             | 1491692  | 152   | 7E-39   | 77/77          | 73                      | 1491692  | 153   | 1E-38   | 77/77          |
|            | Cand85         | 4574720  | 184   | 3E-48   | 93/93          | Cand85                  | 4574720  | 184   | 4E-48   | 93/93          |
|            | 32 *           | 396981   | 180   | 4E-47   | 91/91          | 32                      | 9627327  | 180   | 7E-47   | 91/91          |
|            | JEB2 (1) #     | 45925861 | 162   | 9E-42   | 82/82          | 72 (1)                  | 1491683  | 100   | 2E-22   | 80/90          |
|            | JEB2 (2) #     | 45925861 | 146   | 5E-37   | 77/78          | 72 (2)                  | 1491683  | 84    | 1E-17   | 75/86          |
|            | JEB2 (3) #     | 45925861 | 146   | 5E-37   | 80/82          | 72 (3)                  | 1491683  | 84    | 1E-17   | 78/90          |
| S14        | 16 (1)         | 333031   | 186   | 7E-49   | 94/94          | 16 (1)                  | 333031   | 186   | 1E-48   | 94/94          |
|            | 16 (2)         | 333031   | 170   | 4E-44   | 89/90          | 16 (2)                  | 333031   | 170   | 7E-44   | 89/90          |
|            | 31             | 333048   | 170   | 4E-44   | 92/94          | 31                      | 333048   | 170   | 7E-44   | 92/94          |
|            | 56             | 39053    | 180   | 4E-47   | 91/91          | 56                      | 39053    | 180   | 7E-47   | 91/91          |
|            | 66             | 1020290  | 186   | 7E-49   | 94/94          | 66                      | 1020290  | 186   | 1E-48   | 94/94          |
|            | 62 §           | 577400   | 172   | 1E-44   | 90/91          | 62                      | 39932599 | 172   | 2E-44   | 87/87          |
| S15(T0)    | 16             | 333031   | 182   | 1E-47   | 92/92          | 16                      | 333031   | 182   | 2E-47   | 92/92          |
|            | 51             | 333087   | 180   | 1E-46   | 91/91          | 51]                     | 333087   | 180   | 7E-47   | 91/91          |
| S15(T1)    | 16             | 333031   | 180   | 4E-47   | 91/91          | 16                      | 333031   | 180   | 7E-47   | 91/91          |
|            | 81             | 40804509 | 172   | 1E-44   | 90/91          | 81                      | 40804509 | 172   | 2E-44   | 90/91          |
| S15(T2)    | 16             | 333031   | 180   | 4E-47   | 91/91          | 16                      | 333031   | 180   | 7E-47   | 91/91          |
|            | 83             | 5059324  | 164   | 2E-42   | 83/83          | 83                      | 5059324  | 165   | 4E-42   | 83/83          |
| S16(T0)    | 16             | 333031   | 182   | 1E-47   | 92/92          | 16                      | 333031   | 182   | 2E-47   | 92/92          |
|            | 11             | 333026   | 170   | 9E-44   | 90/91          | 11                      | 333026   | 165   | 4E-42   | 90/91          |
| S16(T1)    | 16             | 333031   | 182   | 1E-47   | 92/92          | 16                      | 333031   | 182   | 2E-47   | 92/92          |
| S16(T2)    | 16             | 333031   | 182   | 1E-47   | 92/92          | 16                      | 333031   | 182   | 2E-47   | 92/92          |
| S17        | 16             | 333031   | 231   | 2E-62   | 117/117        | 16                      | 333031   | 232   | 3E-62   | 117/117        |
| S18        | 81 (1)         | 40804509 | 178   | 2E-46   | 90/90          | 81 (1)                  | 40804509 | 178   | 3E-46   | 90/90          |
|            | 81 (2)         | 40804509 | 170   | 4E-44   | 89/90          | 81 (2)                  | 40804509 | 170   | 6E-44   | 89/90          |
|            | 81 (3)         | 40804509 | 162   | 9E-42   | 88/90          | 81 (3)                  | 40804509 | 163   | 2E-41   | 88/90          |
|            | Cand89         | 22095322 | 164   | 2E-42   | 90/92          | Cand89                  | 22095322 | 159   | 2E-40   | 90/92          |
| C-4 II     | 18             | 60975    | 186   | 7E-49   | 94/94          | 18                      | 60975    | 192   | 2E-50   | 97/97          |
| CaSki      | 16             | 333031   | 186   | 7E-49   | 94/94          | 16                      | 333031   | 186   | 1E-48   | 94/94          |
| HPV16clone | 16             | 333031   | 186   | 7E-49   | 94/94          | 16                      | 333031   | 186   | 1E-48   | 94/94          |

Genotyping by NCBI Blastn: \*, HPV32 (GI | 507143814); #, HPVJEB2 (GI | 217885000); §, HPV62 (GI | 577400).

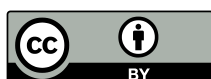

© 2016 by the authors; licensee MDPI, Basel, Switzerland. This article is an open access article distributed under the terms and conditions of the Creative Commons by Attribution (CC-BY) license (<http://creativecommons.org/licenses/by/4.0/>).
